# Supplementary material for: A comprehensive analysis of coregulator recruitment, androgen receptor function and gene expression in prostate cancer
Source: eLife journal article supplement (doi:10.7554/elife.28482), 2017-08-18
Supplement: supp [file elife-28482-supp-v1.zip]

**Supplemental File 8. TP53 binding motif identified from the promoters of WDR77- and p53- dependent androgen-responsive genes.**

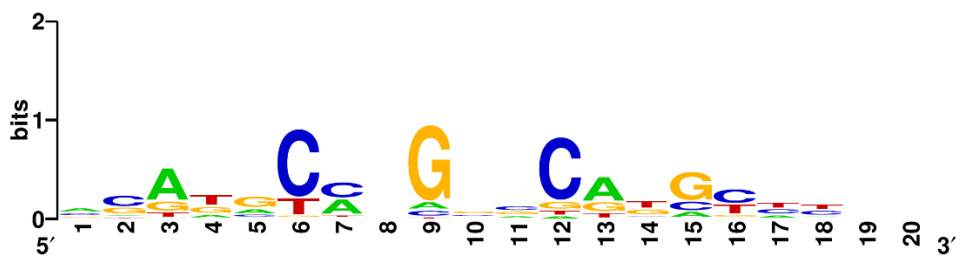

Supplemental File 8
