# Supplementary material for: A comprehensive analysis of coregulator recruitment, androgen receptor function and gene expression in prostate cancer
Source: eLife journal article supplement (doi:10.7554/elife.28482), 2017-08-18
Supplement: supp [file elife-28482-supp-v1.zip]

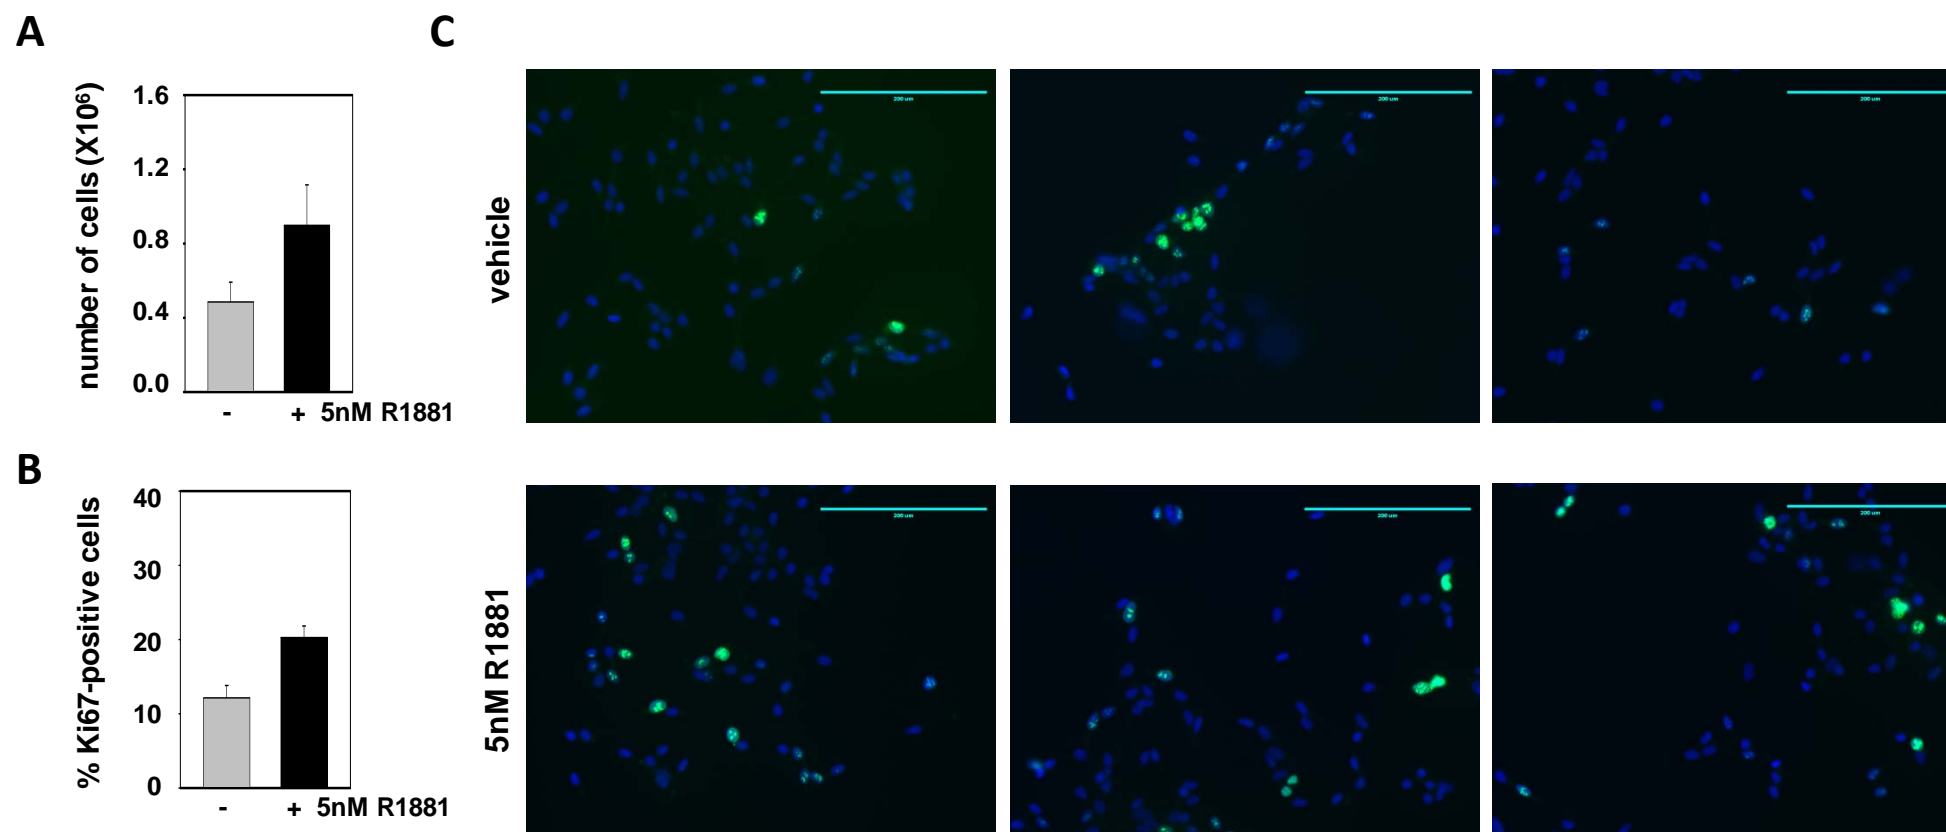

Figure 1 - Supplementary Figure 2

**Figure 1 – Supplementary Figure 2. The effect of 5nM R1881 on proliferation of LNCaP cells.**

A) LNCaP cells were treated with 5nM R1881 or ethanol vehicle for 48 hours. After 48 hours, the cells were detached and the cell number was counted using the trypan blue exclusion method as described. Data are presented as mean  $\pm$  SEM, and represent 4 biological replicates per treatment group. B) LNCaP cells were treated with 5nM R1881 or ethanol vehicle for 48 hours. After 48 hours, cells were analyzed via immunofluorescence staining for proliferation marker Ki-67 (green). Cells were DAPI-stained to visualize cell nuclei (blue). Images were taken at 10x magnification using an EVOS FL system and semi-quantified using ImageJ software version 1.43. The percentage of Ki67-positive nuclei were determined. Data are presented as mean  $\pm$  SEM, and represent counts from 1,800 cells per treatment condition, which were derived from 22 different slide areas each. C) Three representative images of Ki-67-and DAPI-stained cells after 48 hour treatment with ethanol (top panel) or 5nM R1881 (bottom panel).
